# Supplementary material for: UCHL5 controls β-catenin destruction complex function through Axin1 regulation
Source: PubMed Central journal article supplement (PMC8901634; doi:10.1038/s41598-022-07642-1), 2022-03-07
Supplement: 41598_2022_7642_MOESM1_ESM.pdf [file 41598_2022_7642_MOESM1_ESM.pdf]

# Supplementary Information

9 Supplementary figures with legends

## UCHL5 controls $\beta$ -catenin destruction complex function through Axin1 regulation

Wonhee Han<sup>1,#</sup>, Youngmu Koo<sup>2,#</sup>, Leila Chaieb<sup>2</sup>, Byeong-Rak Keum<sup>2</sup>, Jin-Kwan Han<sup>2,\*</sup>

1. F. M. Kirby Neurobiology Center, Boston Children's Hospital, Department of Neurology, Harvard Medical School, Boston, MA 02115, USA.

2. Department of Life Sciences, Pohang University of Science and Technology, 77 Cheongam-Ro, Nam-Gu, Pohang, Gyeongbuk, 37673, Korea.

# Contributed equally

\* Corresponding author: [jkh@postech.ac.kr](mailto:jkh@postech.ac.kr)

# Figure S1

**a**

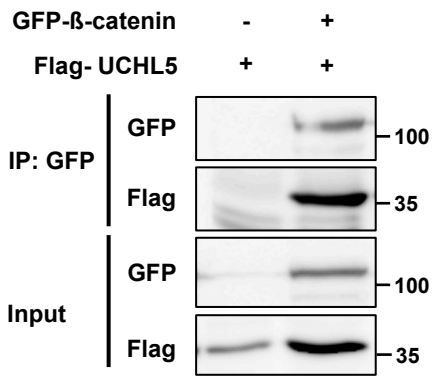

**b**

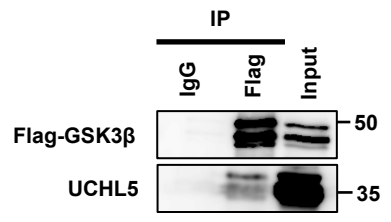

# Figure S2

**a**

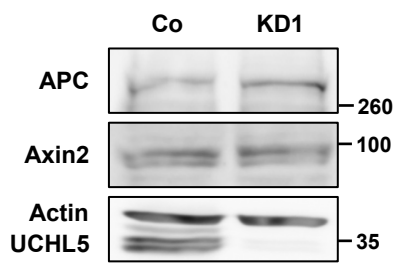

**b**

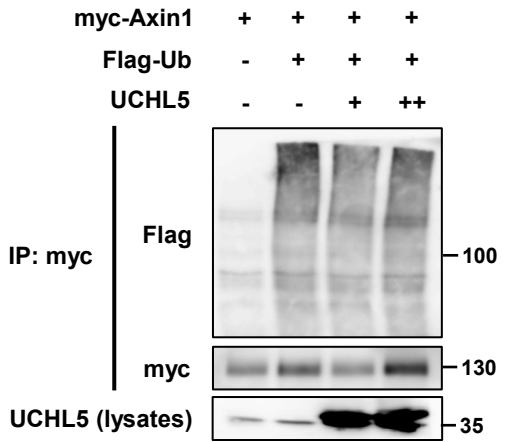

# Figure S3

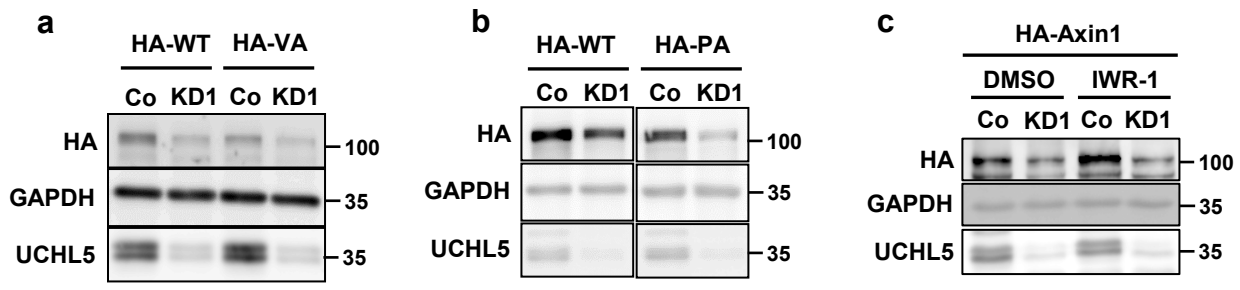

# Figure S4

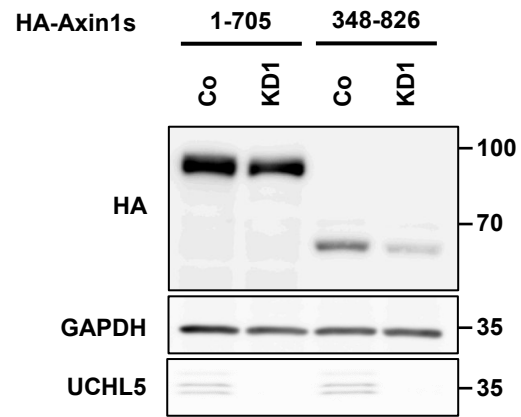

**Figure S5**

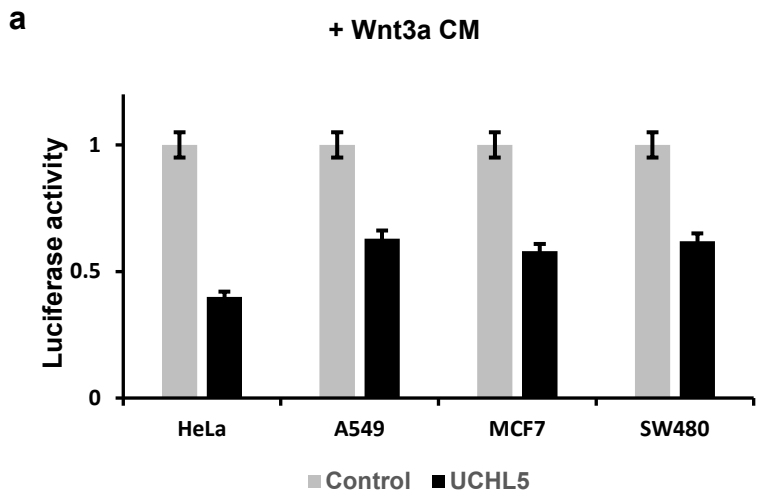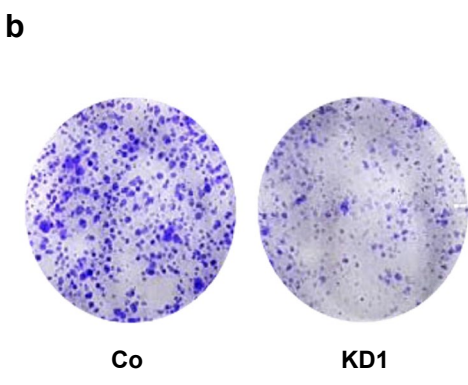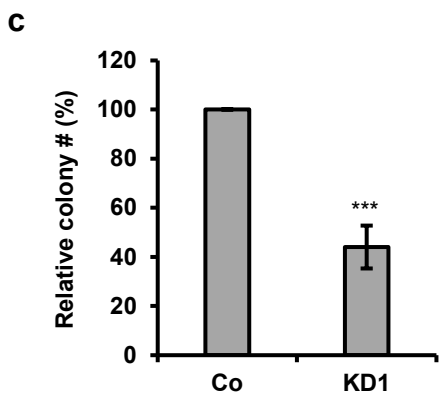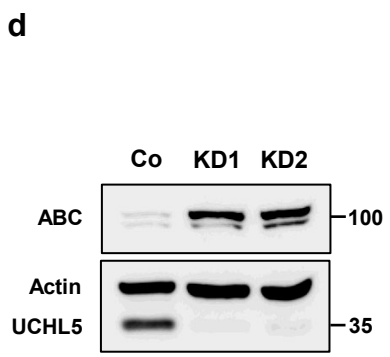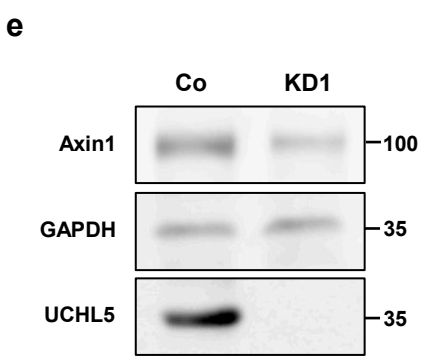

# Figure S6

Figure 1c

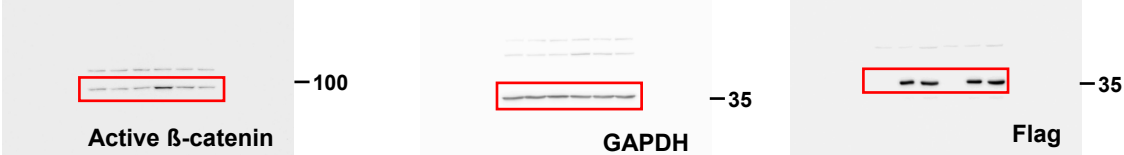

Figure 1g

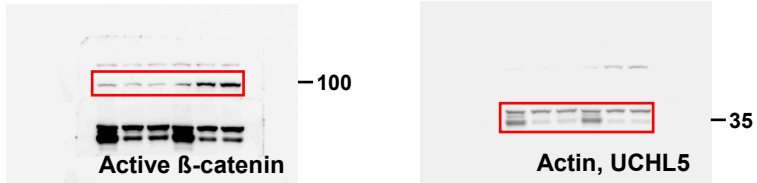

Figure 2b

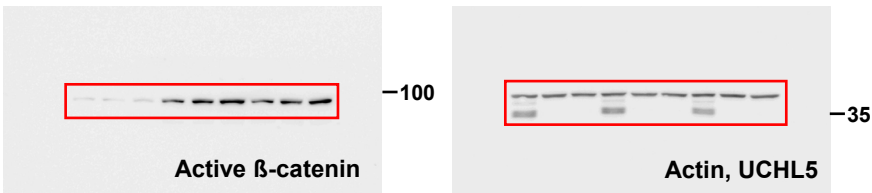

Figure 2c

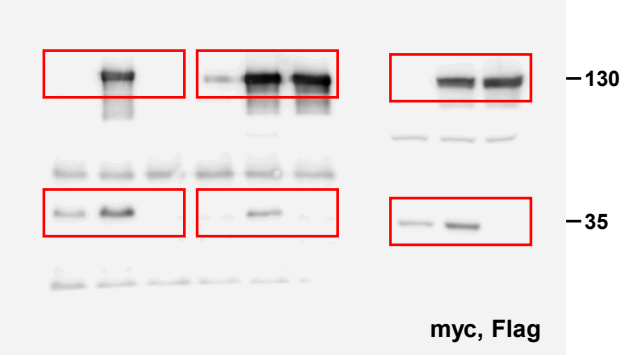

Figure 2d

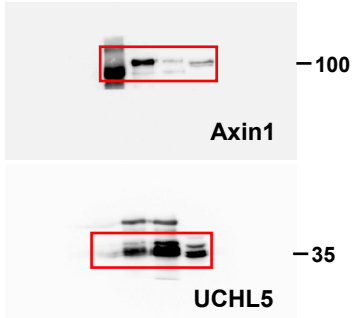

Figure 2f

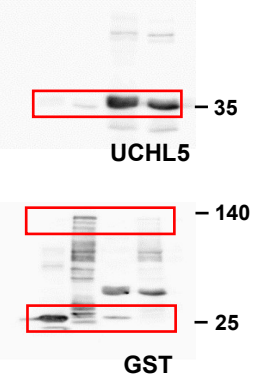

Figure 2h

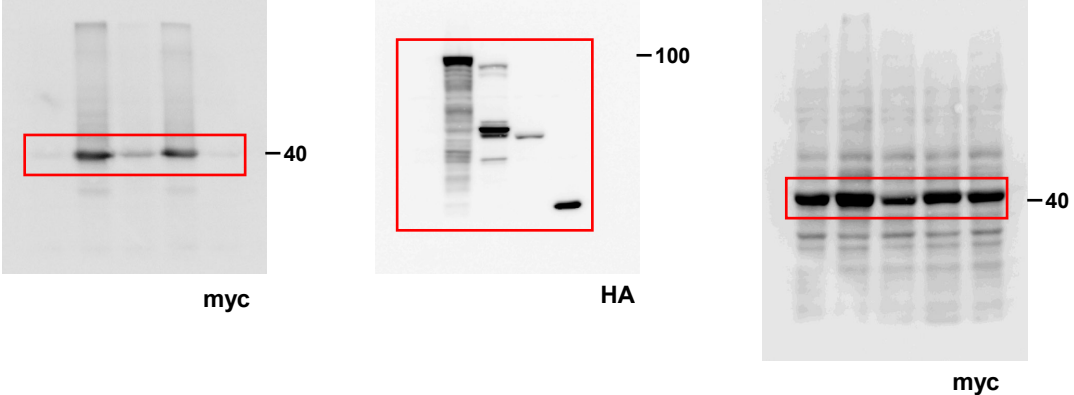

# Figure S7

### Figure 2i

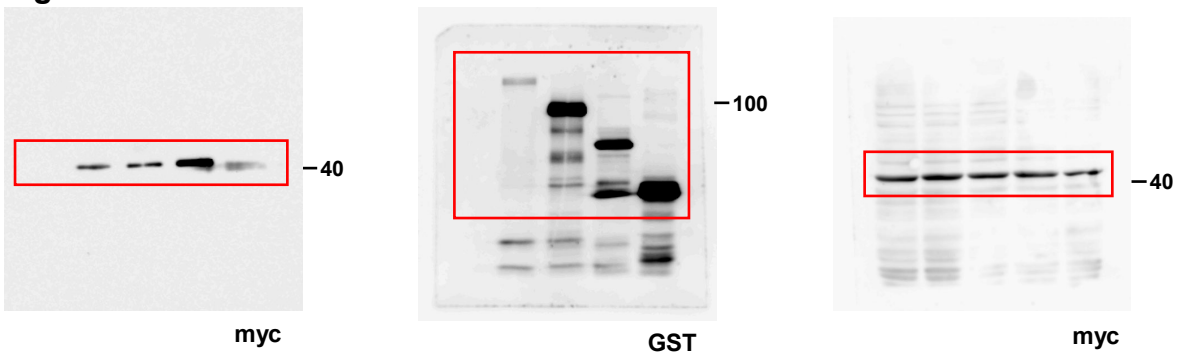

### Figure 3a

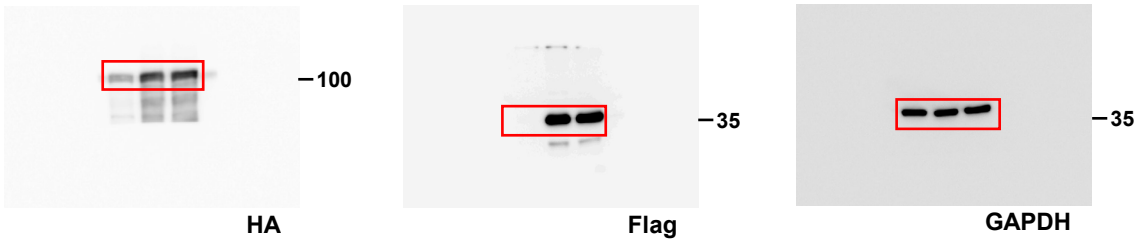

### Figure 3b

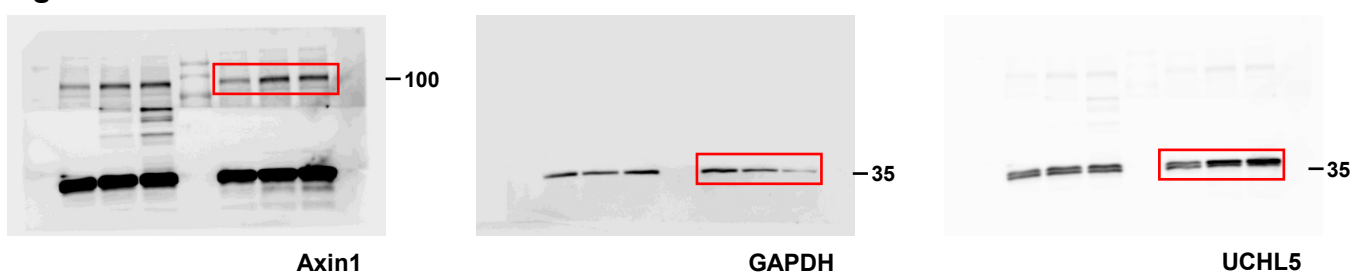

### Figure 3c

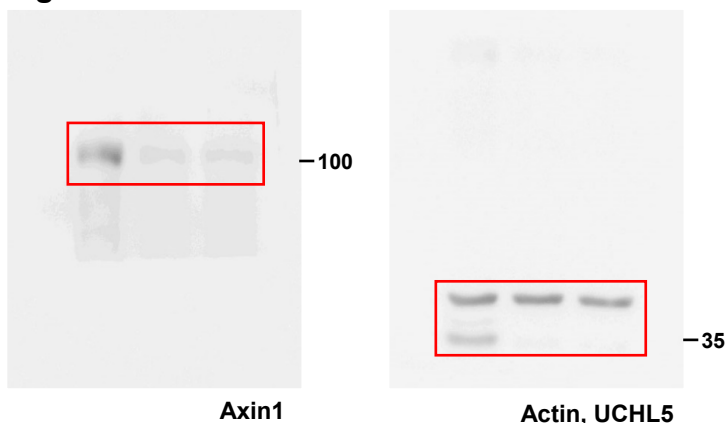

### Figure 3d

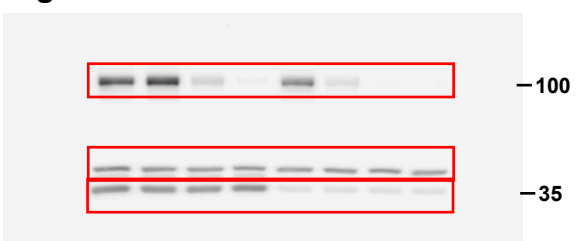



# Figure S8

### Figure 3f

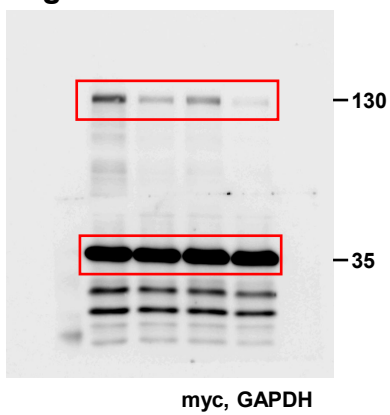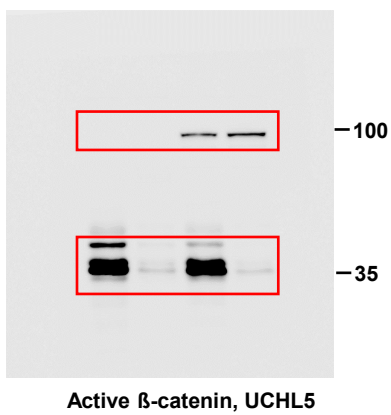

### Figure 3g

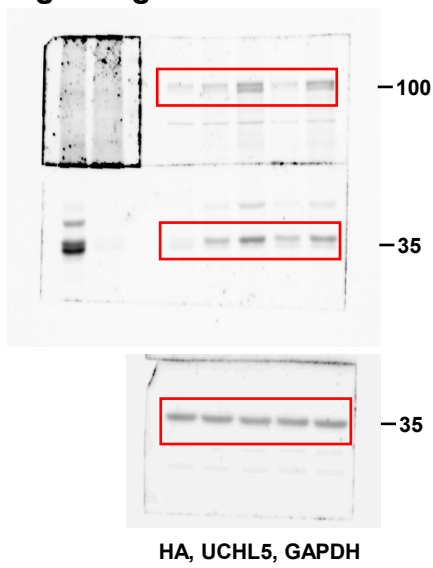

### Figure 3i

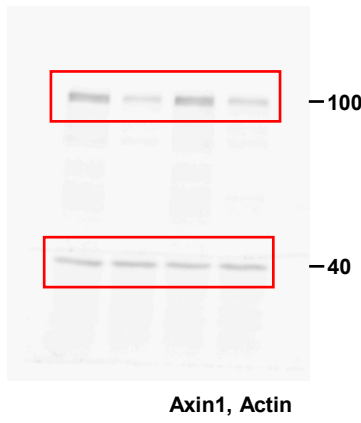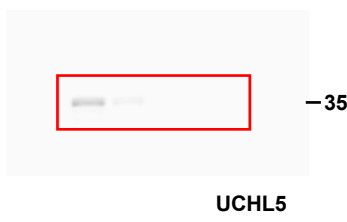

### Figure 3j

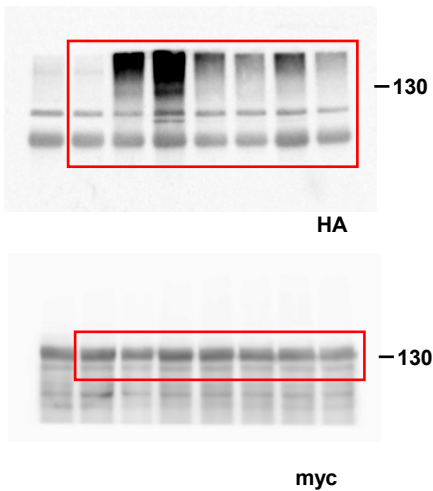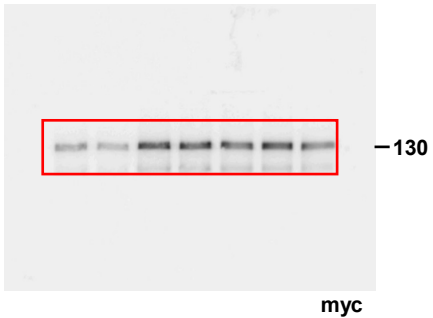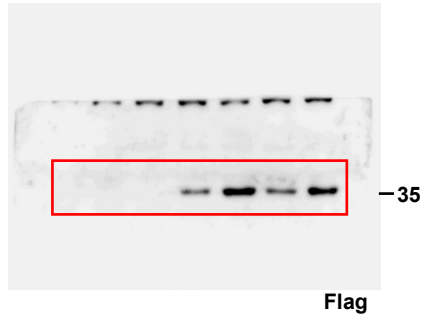

# Figure S9

## Figure 3k

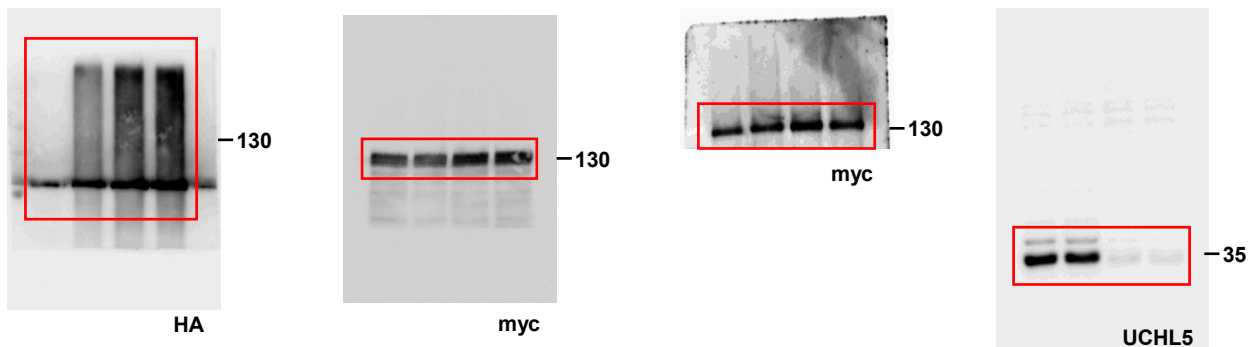

## Figure 4b

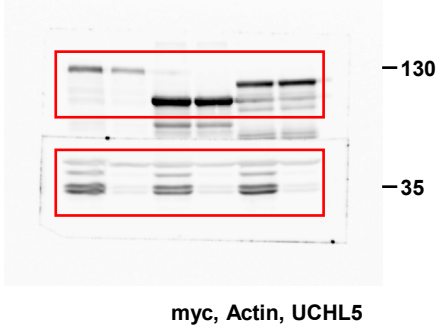

## Figure 4c

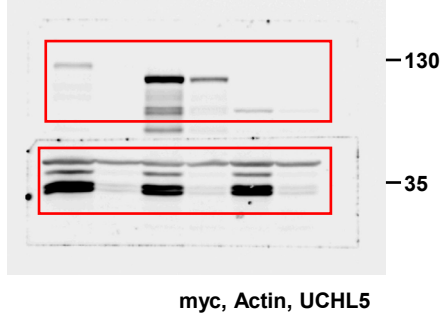

## Figure 4e

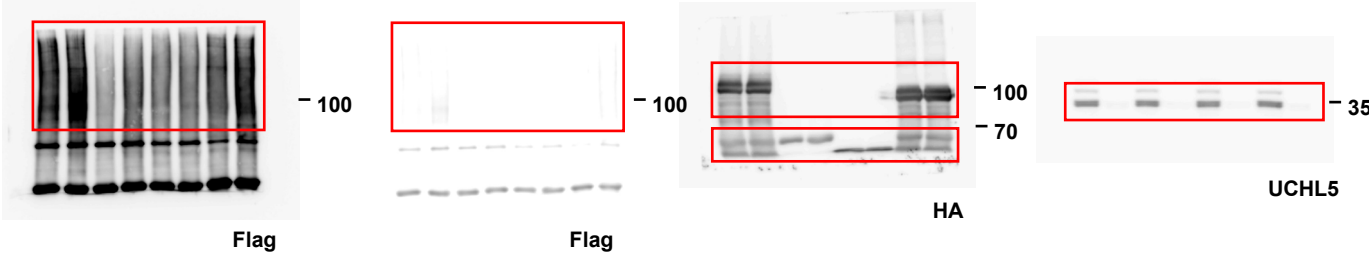

## Figure 5c

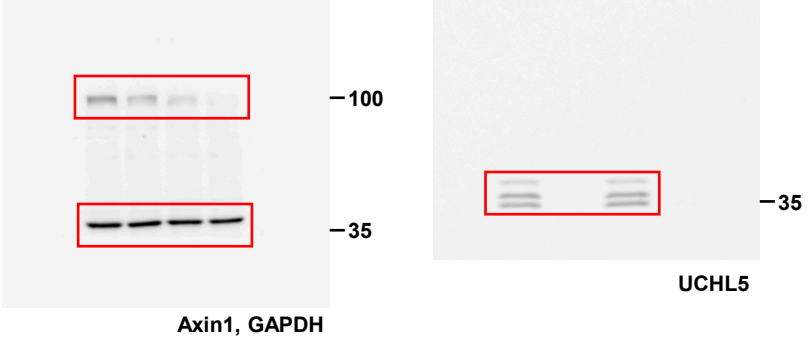

**Figure S1. UCHL5 interacts with components of  $\beta$ -catenin destruction complex.**

**a.** IP assay using HeLa cells. Cells were transfected with Flag-UCHL5 (2 $\mu$ g) and GFP- $\beta$ -catenin (2 $\mu$ g). Then, cell lysates were subjected to immunoprecipitation with anti-GFP. **b.** IP assay using HeLa cells. Cells were transfected with Flag-GSK3 $\beta$  (2 $\mu$ g). Then, cell lysates were subjected to immunoprecipitation with anti-Flag.

**Figure S2. UCHL5 stabilizes Axin1, but its deubiquitinating activity is dispensable.**

**a.** Western blot analysis using Co and KD1 HeLa cells. Cell lysates were immunoblotted with endogenous APC, Axin2, Actin, and UCHL5 antibodies. **b.** *In vitro* ubiquitination assay. HeLa cells were co-transfected with both myc-Axin1 and Flag-Ub plasmids to express polyubiquitinated Axin1. After 48 h, cell lysates were immunoprecipitated using anti-myc antibody to obtain polyubiquitinated Axin1. Precipitated polyubiquitinated Axin1 was then incubated with UCHL5 recombinant proteins (+ 1 $\mu$ g; ++ 2 $\mu$ g).

**Figure S3. UCHL5 stabilizes Axin1 in an independent mechanism from SIAH1/2 and Tankyrase.**

**a, b.** Western blot analysis using Co and KD1 HeLa cells. Cells were transfected with 0.5 $\mu$ g of Wild type Axin1 and two Axin1VxP mutants (HA-WT, HA-VA, and HA-PA). Cell lysates were then immunoblotted to detect the level of HA-Axin1, UCHL5, and GAPDH proteins. **c.** Western blot analysis using Co and KD1 HeLa cells. Cells were transfected with 0.5 $\mu$ g of HA-Axin1, then treated with either DMSO or IWR-1(12Mm) for 16hrs. Cell lysates were immunoblotted to detect the level of HA-Axin1, UCHL5, and GAPDH proteins.

**Figure S4. UCHL5 mediates Axin1 stabilization through the DIX domain.**

1 $\mu$ g of truncated Axin1 mutants (1-705 a.a., 348-826 a.a.) were transfected into WT and KD1 HeLa cells. Resulting cells lysates were subjected to immunoblotting with antibodies against HA, GAPDH, and UCHL5.

**Figure S5. UCHL5 negatively regulates Wnt signal activity in various cancer cells.**

**a.** TOPflash assay using HeLa, A549, MCF7, and SW480. Cells were transfected with the indicated plasmids (50ng *TK-Renilla* reporter; 250ng TOPFlash; 250ng FOPFlash; 2 $\mu$ g pCS2+UCHL5). Then, Wnt3a CM was treated for 16hrs. **b, c.** Clonogenic assay and qualitative analysis of SW480 cells. 200 cells were seeded into a 6-well plate and cultured for 2 weeks until each cell formed colony. colonies were then fixed and stained with crystal violet (\*\*\*)  $p < 0.0005$ ). The data are presented as the mean  $\pm$  SD of the experiments performed in triplicate. **d, e.** Western blot analysis using Co and KD SW480 cells. Cell lysates were immunoblotted to detect the level of active  $\beta$ -catenin, Axin1, UCHL5, Actin, and GAPDH proteins

**Figure S6-S9. Full-length images of gels and blots from the main figures.**
